# Supplementary material for: One-step synthesis of quaternized polyethyleneimine and its application in transesterification reactions
Source: Royal Society of Chemistry journal article supplement (doi:10.1039/d4nj04568h), 2025-01-01
Supplement: d4nj04568h1.pdf [file d4nj04568h1.pdf]

## Supporting Information

### One-step Synthesis of Quaternized Polyethyleneimine and Application in Transesterification Reactions

Junqiang Zhou <sup>a, c, #</sup>, Zhentao Zhao <sup>a, #</sup>, Yuxin Wang <sup>a</sup>, Guangwen Xu <sup>a, c, 1</sup>, Lei Shi <sup>a, b, c, d \*</sup>

<sup>a</sup> Key Laboratory on Resources Chemicals and Materials of Ministry of Education, Shenyang University of Chemical Technology, Shenyang 110142, PR China;

<sup>b</sup> Xinjiang Zhichuang Materials Co., Ltd., Shihezi, Xinjiang 832000, China;

<sup>c</sup> Institute of Industrial Chemistry and Energy Technology, Shenyang University of Chemical Technology, Shenyang 110142, PR China;

<sup>d</sup> Xinjiang Tianye (Group) Co., Ltd., Shihezi, Xinjiang 832000, China.)

\* Corresponding author.

# Junqiang Zhou and Zhentao Zhao contributed equally to this work.

E-mail address: shilei@syuct.edu.cn (Lei Shi)

## 1. Gas verification in catalyst synthesis

**Experimental procedure:** 10 g of B-PEI and 20 g of DMC were added to the reactor and slowly heated to 100 °C. The mixture was continuously stirred for 6 h. After cooling to room temperature, the discharged gas was collected. The GC-4100 gas chromatograph, calibrated with nitrogen, was used for component analysis. As shown in Fig. S1, the results indicate that the gas is primarily composed of CO<sub>2</sub>.

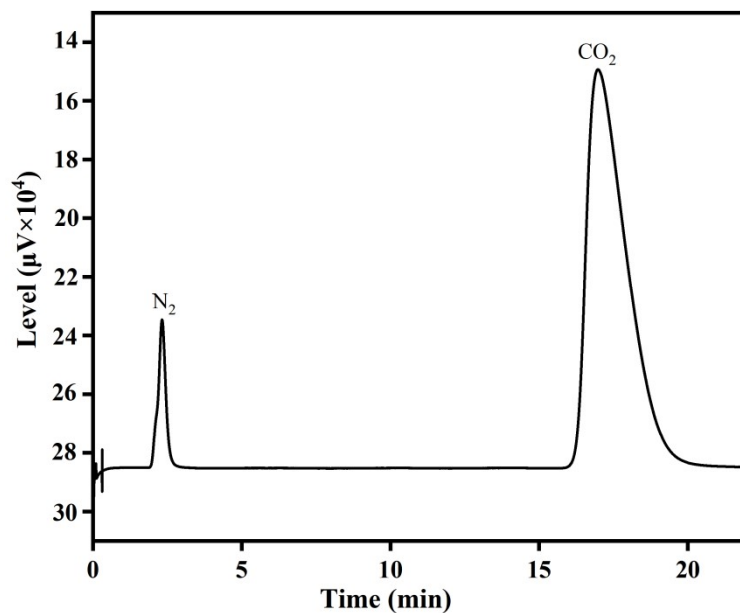

**Fig. S1.** Gas verification in catalyst synthesis.

## 2. Liquid validation in catalyst synthesis

**Experimental procedure:** 10 g of B-PEI and 20 g of DMC were added to a reactor and slowly heated to 100 °C. The mixture was continuously stirred for 6 h. When the mixture was cooled to room temperature, the liquid was transferred to a rotary evaporator and evaporated at -0.1 MPa at 50, 60, and 70 °C for 30 min, and finally at 80 °C for 1 h. The effluent was analyzed using a GC-2010 Pro gas chromatograph. As shown in Fig. S2, the results indicate that the effluent is mainly composed of unreacted DMC and a small amount of MeOH

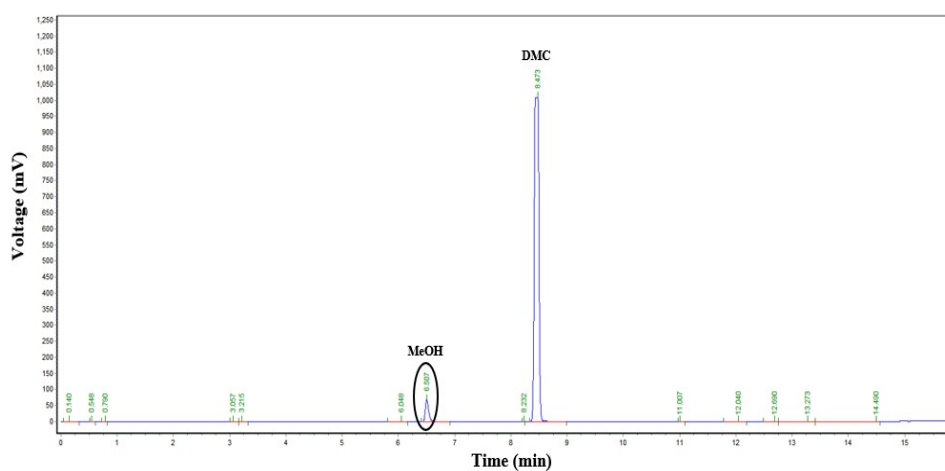

**Fig. S2.** Verification of methanol in catalyst synthesis.

### 3. $^{13}\text{C}$ NMR of D-BPEI after six uses

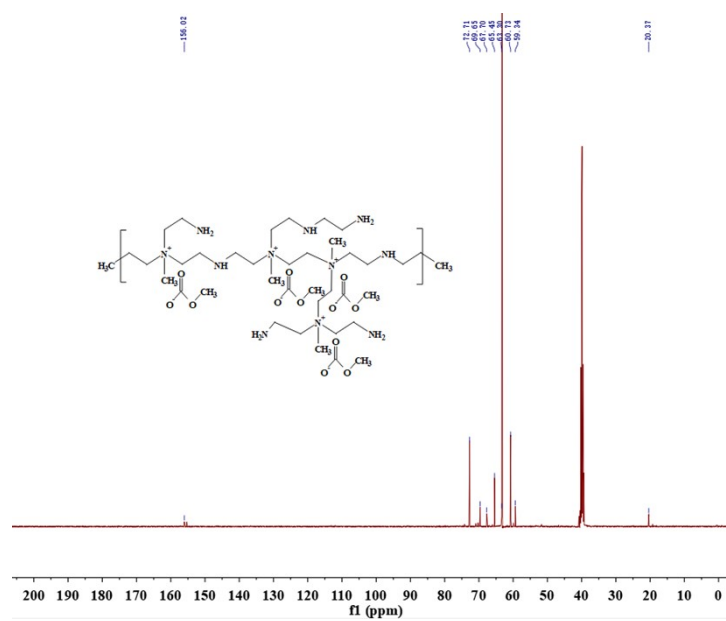

**Fig. S3.**  $^{13}\text{C}$  NMR of D-BPEI after six uses.
